# Supplementary material for: Leaf-cutting ants (Atta mexicana) as facilitators of arthropods through waste dumps in a neotropical city of Mexico.
Source: Research Square preprint supplement (doi:10.21203/rs.3.rs-8595983/v1), 2026-02-02
Supplement: Supplementary file 1 [file 7b27dd0b659a29538b29f3cb.docx]

| **Table 1 *SM*.** Abundance of arthropod orders and families found in *Atta mexicana* (Hymenoptera: Formicidae: Attini) waste dumps in Xalapa, Veracruz, Mexico. | | | | | | |
| --- | --- | --- | --- | --- | --- | --- |
| **Subphylum** | **Class** | **Order** | **Family/Genus/Specie** | **Abundance** | | |
| **W** | **O** | **A** |
| Hexapoda | Enthognata | Collembola | F/undetermined | 1810 | 216 | - |
|  | Insecta | Blattodea | Blattellidae | (16) | 2 | 1 (1) |
|  |  |  | F/undetermined |  | (3) | (1) |
|  |  | Coleoptera | Chrysomelidae | - | 1 | - |
|  |  |  | Histeridae | 24 | 7 | 1 |
|  |  |  | Lycidae | - | - | 1 |
|  |  |  | Monotomidae | 1 | - | - |
|  |  |  | Passalidae  *Ptichopus angulatus* | 5 (12) | 3 | 2 |
|  |  |  | Ptiliidae | 3 | 1 | - |
|  |  |  | Rhizophagidae | 1 | - | - |
|  |  |  | Scarabaeidae | 7 (229) | 2 (1) | (1) |
|  |  |  | Staphylinidae |  |  |  |
|  |  |  | *Platydracus fulvomaculatus* | 11 (13) | 2 | 1 |
|  |  |  | *Stenus* sp. | - | - | 1 |
|  |  |  | *Paederus* sp. | - | 1 | - |
|  |  |  | *Philonthus*?sp. | 5 | 1 | - |
|  |  |  | *Bryoporus*?sp. | - | 2 | - |
|  |  |  | *Oxytelus*?sp. | 1 | 1 | 1 |
|  |  |  | *Morfo* sp1. | 4 | 3 | 2 |
|  |  |  | *Morfo* sp2. | - | 1 | - |
|  |  |  | *Morfo* sp3. | - | - | 1 |
|  |  |  | G/undetermined | (10) |  |  |
|  |  |  | Tenebrionidae | (12) | - | - |
|  |  |  | F/undetermined | 2 (1) | 7 (1) | 1 |
|  |  | Dermaptera | Forficulidae | 5 | - | - |
|  |  |  | Labiidae | 4 | - | - |
|  |  | Diptera | Bibionidae | 1 | - | - |
|  |  |  | Dolichopodidae | (11) | 1 | - |
|  |  |  | Empididae | - | - | 11 |
|  |  |  | Muscidae | (82) | 1 (5) | - |
|  |  |  | Platypezidae | - | - | (1) |
|  |  |  | Psychodidae | 1 | - | - |
|  |  |  | Ptychopteridae | (1) | - | - |
|  |  |  | Rhagionidae | - | - | 2 |
|  |  |  | Sciaridae | 3 | 4 | 1 |
|  |  |  | Simuliidae | 1 | - | - |
|  |  |  | Sphaeroceridae | 1 | 7 | 2 |
|  |  |  | Stratiomyidae | (31) | (2) | (1) |
|  |  |  | F/undetermined | 5 (154) | 19 (10) | 3 (1) |
|  |  | Hemiptera | Aphididae | - | - | 2 |
|  |  |  | Cercopidae | - | - | 1 |
|  |  |  | Cydnidae | 3 | - | - |
|  |  |  | Coccoidea | - | - | (1) |
|  |  |  | Coreidae | - | (1) | - |
|  |  |  | Gelastocoridae | 2 | 1 | - |
|  |  |  | Lygaeidae | 2 (2) | (5) | 5 (3) |
|  |  |  | Miridae | - | - | 1 |
|  |  |  | Nabidae | - | 1 | 1 |
|  |  |  | Pentatomidae | 1 | - | 2 |
|  |  |  | Rhyparochromidae | - | 3 | - |
|  |  |  | Tingidae | - | - | 1 |
|  |  |  | F/undetermined | - | 1(1) | (1) |
|  |  | Hymenoptera | Braconidae | - | - | 1 |
|  |  |  | Diapriidae | - | - | 1 |
|  |  |  | Formicidae | 175 | 301 (2) | 271 |
|  |  |  | (Microhymenoptera) | 2 | 16 | 1 |
|  |  |  | F/undetermined | 1 (2) | (1) | 2 |
|  |  | Lepidoptera | F/undetermined | 1 (14) | (2) | 1 (4) |
|  |  | Neuroptera | Chrysopidae | - | - | (1) |
|  |  | Orthoptera | Gryllidae | 2 | - | 1 |
|  |  | Phasmatodea | Phasmatidae | - | - | 2 |
|  |  | Psocoptera | Trogiidae | - | - | 2 |
|  |  |  | F/undetermined | (1) | - | 2 |
|  |  |  | Pseudocaeciliidae | 1 (1) |  |  |
| Chelicerata | Arachnida | Acari | F/undetermined | 233 | 171 | 28 |
|  |  | Araneae | Corinnidae |  |  |  |
|  |  |  | (cf *Abapeba* sp.) | 1 | - | - |
|  |  |  | Clubionidae | - | - | - |
|  |  |  | Filistatidae |  |  |  |
|  |  |  | *Kukulcania* sp. | - | - | 1 |
|  |  |  | Lycosidae (*Hogna* sp) | 10 (1) | (1) | 1 |
|  |  |  | Linyphiidae | - | 1 | 1 |
|  |  |  | Salticidae | - | - | (1) |
|  |  |  | Teridiidae | - | - | 1 |
|  |  |  | Thomisidae |  |  |  |
|  |  |  | *Misumenoides* sp. | - | - | 1 |
|  |  |  | Tetraghnatidae |  |  |  |
|  |  |  | *Tetraghnata* sp. | - | - | 2 (1) |
|  |  |  | Zodariidae | - | - | (2) |
|  |  |  | F/undetermined | 2 (2) | 2 | 6 (1) |
|  |  | Opiliones | F/undetermined | 2 | - | 25 |
|  |  | Pseudoscorpiones | F/undetermined | 5 | 2 | - |
| Myriapoda | Chilopoda | Scolopendromorpha | Scolopocryptopidae |  |  |  |
|  |  |  | *Newportia* sp. | 5 (1) | - | - |
|  | Diplopoda | Spirobolida | Spirobolidae |  |  |  |
|  |  |  | *Hiltonius* sp. | 2 | - | - |
|  |  |  | F/undetermined | 1 | - | 1 |
|  |  | Polydesmida | Rhachidesmidae | 1 | - | - |
|  |  |  | F/undetermined | 1 | (2) | 1 |
| Crustacea | Malacostraca | Isopoda | F/undetermined | 61 (3) | 101(31) | 25 |
| **W** = Within the waste dump; **O** = On the waste dump; **A** = Around the waste dump.  Numbers outside the parentheses indicate adult abundance and numbers in parentheses indicate immature abundance. A dash (-) indicates the absence of the family in the sampling area. F/undetermined = Undetermined family. G/ undetermined = Undetermined genus. | | | | | | |
