# Supplementary material for: Leaf-cutting ants (Atta mexicana) as facilitators of arthropods through waste dumps in a neotropical city of Mexico.
Source: Research Square preprint supplement (doi:10.21203/rs.3.rs-8595983/v1), 2026-02-02
Supplement: Supplementary file 2 [file cca779f84f08cac9e528a050.docx]

**Table 2 *MS*.** Results of the regression analyses through generalized linear models with a Poisson distribution and a log link function of immature and adult abundance and family richness of arthropods within, on, and around *Atta mexicana* waste dumps (Xalapa, Veracruz, Mexico). The deviation values ​​(χ²) and the associated probability values are shown in parentheses.

| **VEGETATION COVER** | | | |
| --- | --- | --- | --- |
| **Microhabitat** | **Adults** | **Immature** | **Families** |
| Within | 11.45 (0.835) | 6.75 (0.460) | 0.10 (0.836) |
| On | 12.20 (0.320) | 2.55 (0.167) | **9.27 (0.0023)*** |
| Around | 7.21 (0.587) | 0.52 (0.470) | 1.80 (0.180) |
| **TEMPERATURE** | | | |
| Within | 52.18 (0.634) | 14.38 (0.297) | 2.32 (0.312) |
| On | 8.55 (0.750) | 3.40 (0.695) | 0.11 (0.737) |
| Around | 3.95 (0.692) | 0.87 (0.352) | 1.02 (0.313) |
| **HUMIDITY** | | | |
| Within | 51.80 (0.613) | 32.05 (0.103) | 0.03 (0.917) |
| On | 112.50 (0.192) | 20.90 (0.241) | 2.06 (0.152) |
| Around | 11.699 (0.485) | 0.028 (0.865) | 2.72 (0.098) |

***** A dependency relationship was found between the included variables.
